# Supplementary material
Source: PubMed Central journal article supplement (PMC8113749)
Supplement: mmc1.pdf [file mmc1.pdf]

**Supplemental information**

**Diverse immunoglobulin gene usage  
and convergent epitope targeting in neutralizing  
antibody responses to SARS-CoV-2**

**Xiaojuan Zhou, Fengge Ma, Jun Xie, Meng Yuan, Yunqiao Li, Namir Shaabani, Fangzhu Zhao, Deli Huang, Nicholas C. Wu, Chang-Chun D. Lee, Hejun Liu, Jiali Li, Zhonghui Chen, Yazhen Hong, Wen-Hsien Liu, Nengming Xiao, Dennis R. Burton, Haijian Tu, Hang Li, Xin Chen, John R. Teijaro, Ian A. Wilson, Changchun Xiao, and Zhe Huang**

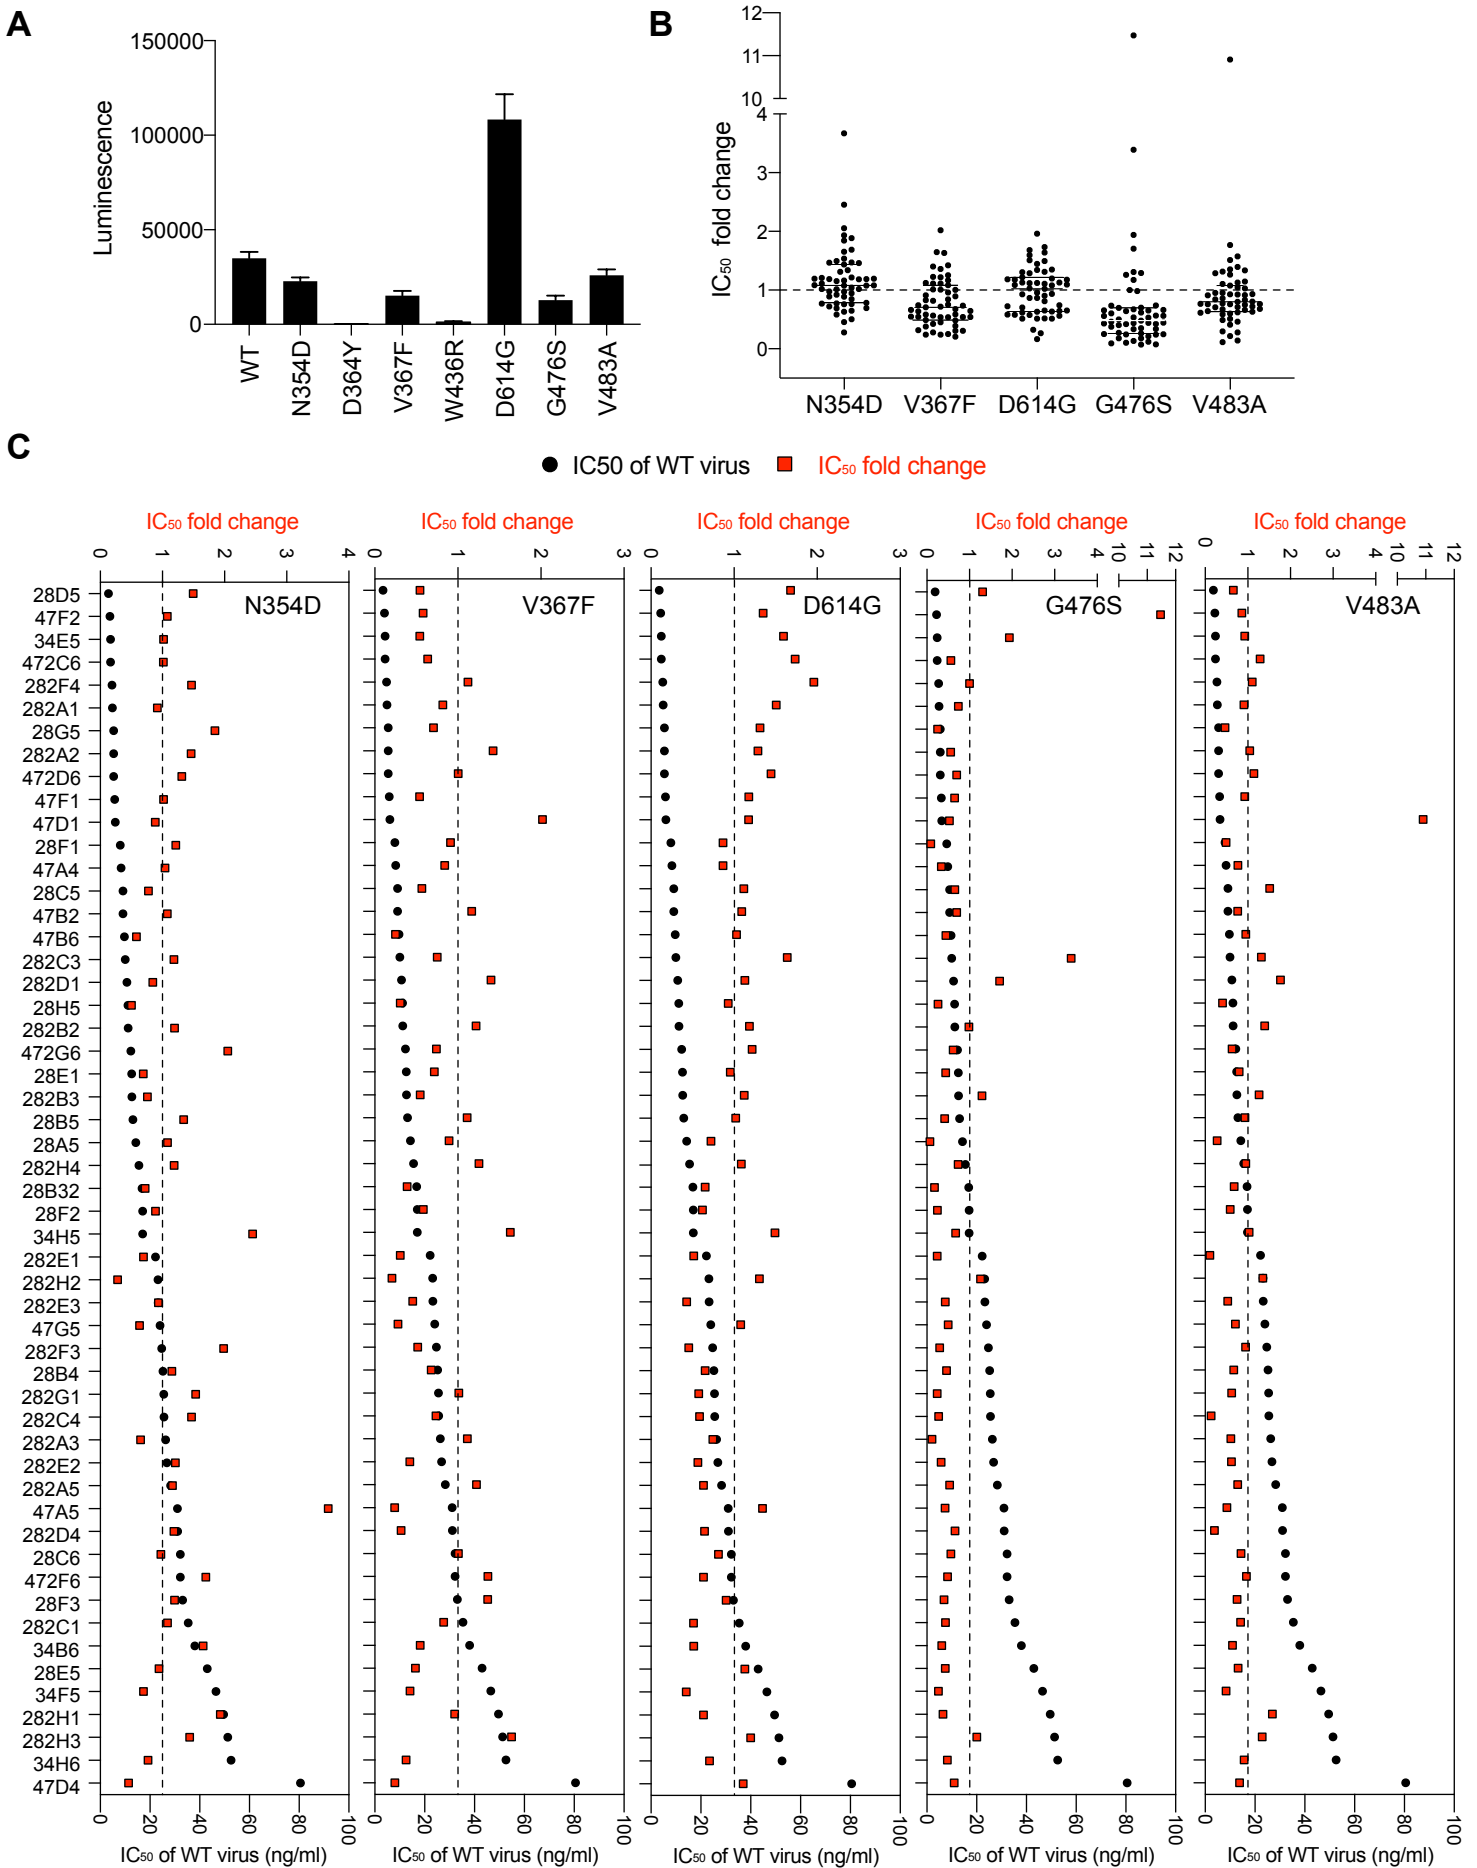

**Figure S1. Neutralizing antibodies effectively neutralize various SARS-CoV-2 S variants.** (A) Infection ability of lentiviruses pseudotyped with various SARS-CoV-2 S protein variants. (B, C) Fold change in neutralizing activity of antibodies against lentiviruses pseudotyped with various SARS-CoV-2 S protein variants as compared to lentiviruses pseudotyped with SARS-CoV-2 S protein from the Wuhan-Hu-1 strain (WT virus). The neutralization IC<sub>50</sub> values are mean of three technical replicates. Related to Figure 3.

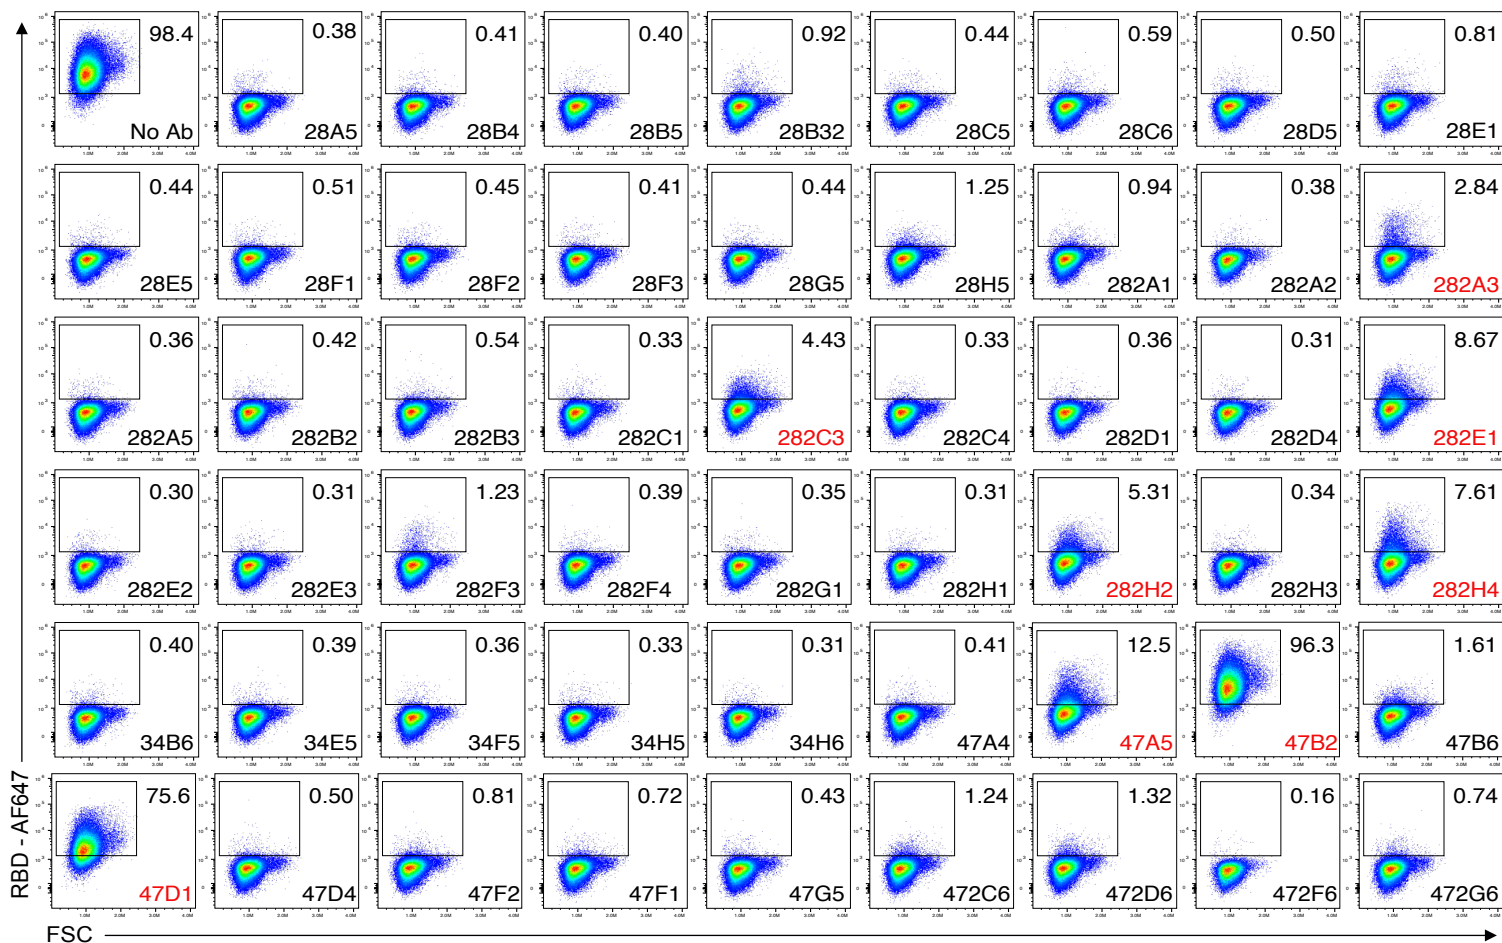

**Figure S2. Flow cytometry competition assay of nAbs and RBD on ACE2.** Antibodies were mixed with RBD-AF647 at a molar ratio of 2:1 and incubated with HeLa-ACE2 cells. SARS-CoV-2 RBD binding of HeLa-ACE2 cells was quantified by flow cytometry. Antibodies that did not completely block RBD binding to HeLa-ACE2 cells were marked in red. Related to Figure 4.

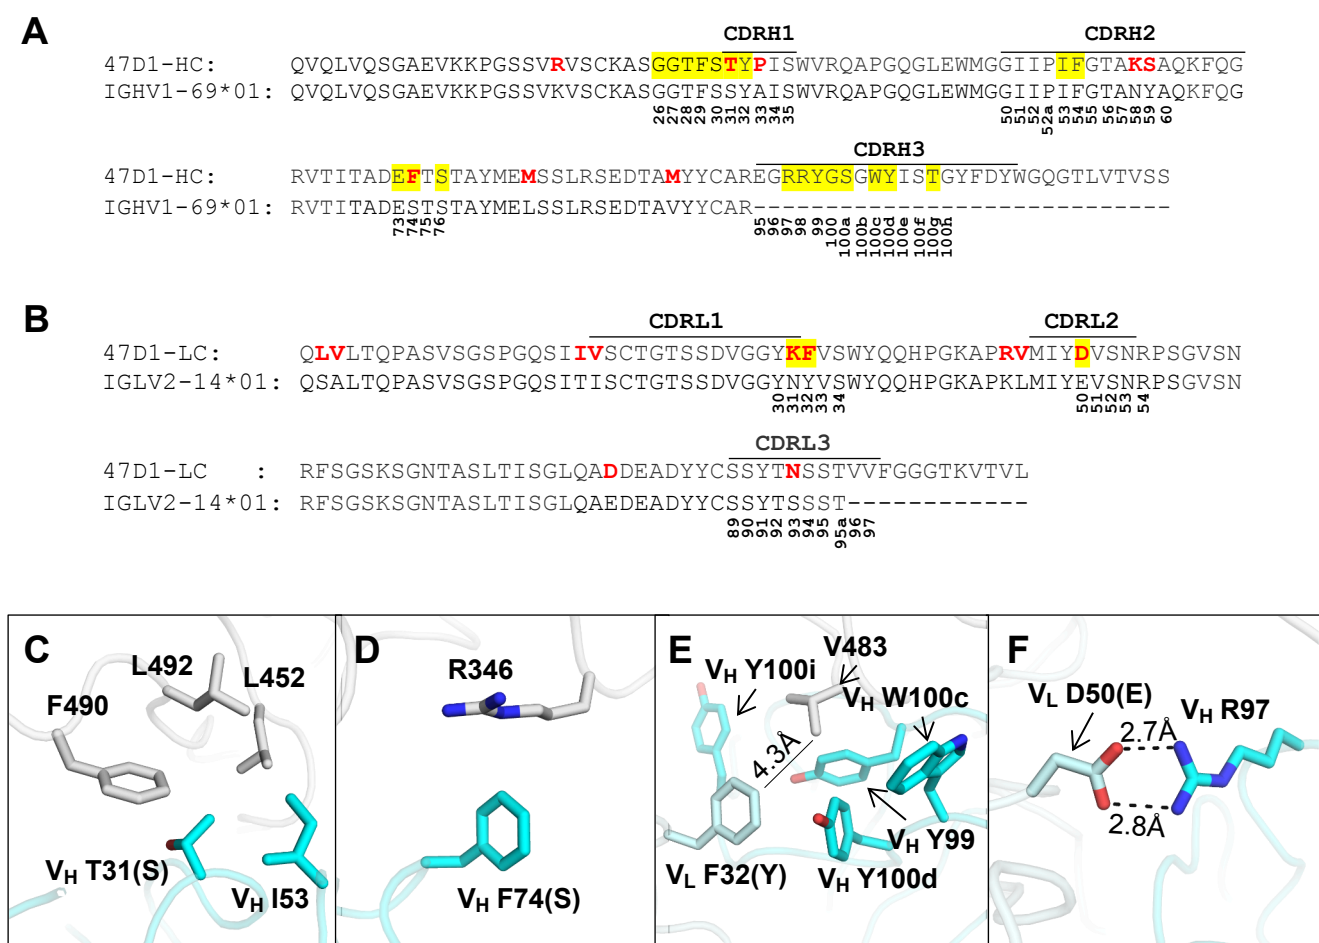

**Figure S3. Putative germline sequences and somatically mutated residues of 47D1.** (A-B) Alignment of 47D1 with the germline IGHV1-69\*01 sequence (nucleotide SHM rate 3.7%) and IGLV2-14\*01 (nucleotide SHM rate 5.1%). The regions that correspond to CDR H1, H2, H3, L1, L2, and L3 are indicated. Residues that differ from the germline are highlighted in red. Residues that interact with the RBD are highlighted in yellow. Residue positions in the CDRs are labeled according to the Kabat numbering scheme. (C-F) Somatic mutations  $V_H$  S31T,  $V_H$  S74F,  $V_L$  Y32F, and  $V_L$  E50D are located in the 47D1 paratope and other somatic mutations in the CDRs may affect overall CDR conformation and interactions. Germline residues are shown in brackets. Hydrogen bonds are represented by dashed lines. Distances between atoms are shown in solid lines. 47D1 heavy chain is in cyan and light chain is in pale cyan. SARS-CoV-2 RBD is in white. Related to Figure 7.

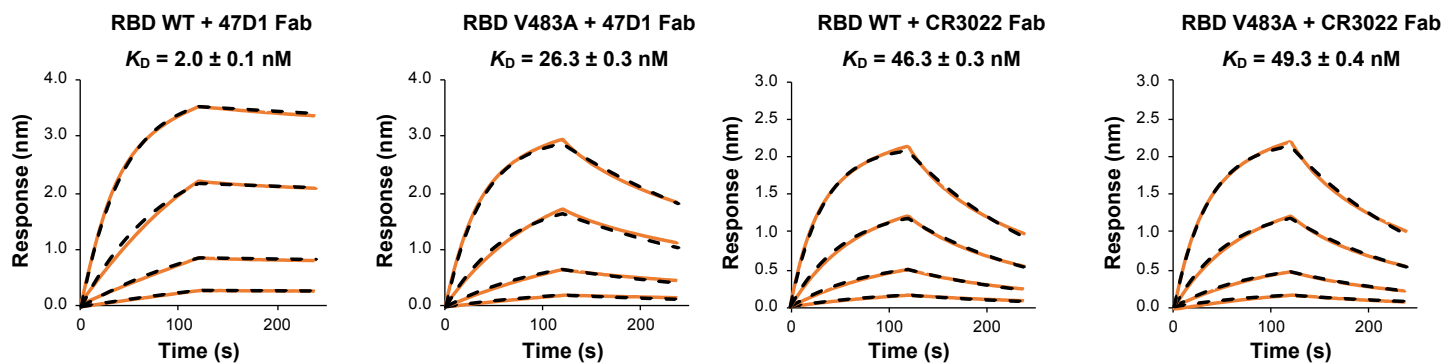

**Figure S4. Sensorgrams for binding of 47D1 and CR3022 Fabs to wild-type SARS-CoV-2 RBD and a natural variant V483A.** Binding kinetics were measured by biolayer interferometry with RBD proteins loaded on the biosensor and Fabs in solution. Orange solid lines represent the response curves and black dashed lines represent the 1:1 binding model. Binding kinetics were measured for four concentrations of Fab at 2-fold dilution ranging from 160 nM to 20 nM. Representative results of three replicates for each experiment are shown. Related to Figure 7.

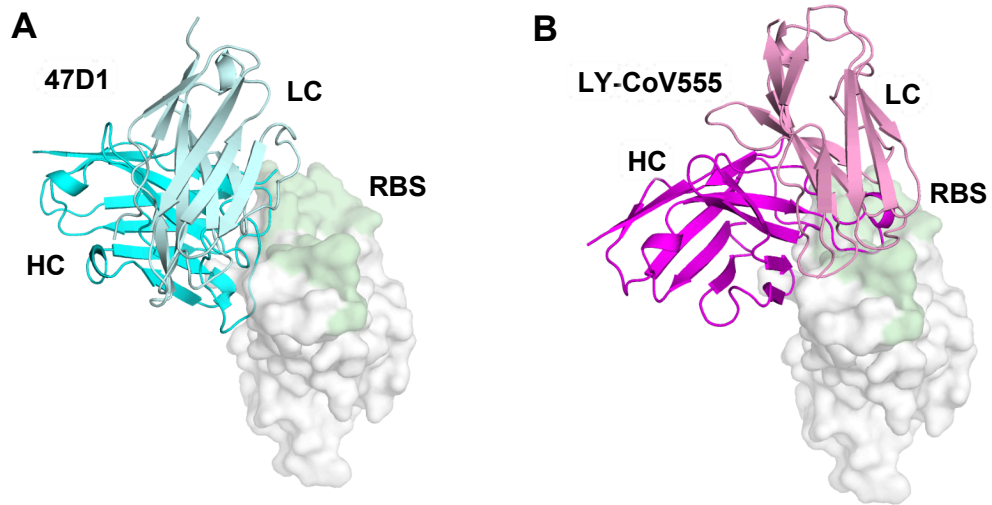

**Figure S5. Comparison of IGHV1-69 antibodies 47D1 and LY-CoV555.** SARS-CoV-2 RBD is shown as a white surface with the RBS in pale green. The Fv regions of the bound antibodies (A) 47D1 (this study) and (B) LY-CoV555 (PDB 7KMG, Jones et al., 2020) are represented by cyan/pale cyan and magenta/pink cartoons, respectively. Related to Figure 7.

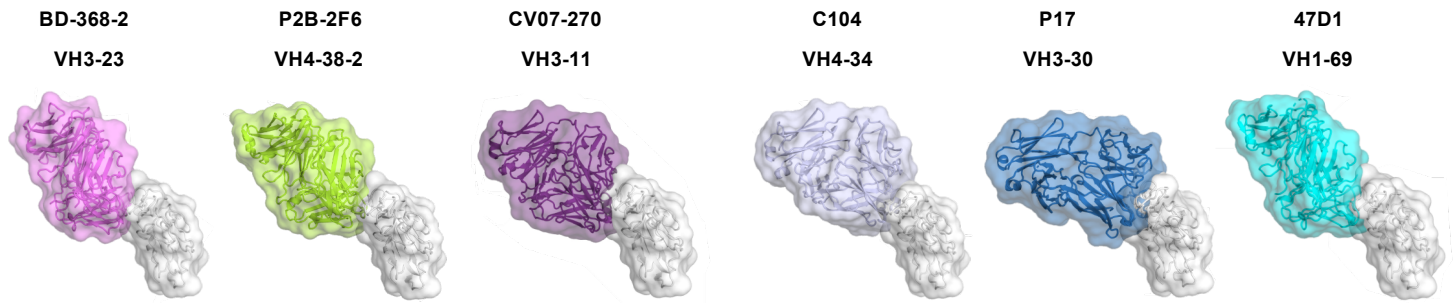

**Figure S6. The epitope of 47D1 and other SARS-CoV-2 RBS-C antibodies.** SARS-CoV-2 RBS-C antibodies bind to a similar epitope with a very similar angle of approach despite being encoded by distinct germline genes. Germline genes of BD-368-2 (PDB 7CHH) (Du et al., 2020), P2B-2F6 (PDB 7BWJ) (Ju et al., 2020), CV07-270 (PDB 6XKP) (Kreye et al., 2020), C104 (PDB 7K8U) (Barnes et al., 2020a), P17 (PDB 7CWO), (Yao et al., 2021) and 47D1 (this study) are analyzed by IgBLAST (Ye et al., 2013) and shown on top of each Fab-RBD complex structure, where the RBD is in white and the Fabs in different colors. Related to Figure 7.

| Clone | IC <sub>50</sub> (ng/ml) | Donor | Heavy Chain CDR3              | Heavy Chain V | Light Chain CDR3 | Light Chain V |
|-------|--------------------------|-------|-------------------------------|---------------|------------------|---------------|
| 28D5  | 3.3                      | PT28  | CARYAKKTFDSESSDYHFDYW         | IGHV4-59      | CCSYAGSSTWVVF    | IGLV2-23      |
| 47F2  | 3.9                      | PT47  | CAAPSCDTSICYDAFNIW            | IGHV1-58      | CQHYGTSIFTF      | IGKV3-20      |
| 34E5  | 4.1                      | PT34  | CAAPHCGGVCYDGFVDW             | IGHV1-58      | CQQYDRSPWTF      | IGKV3-20      |
| 472C6 | 4.1                      | PT47  | KRGGYCSSTICYTRYYYMDVW         | IGHV3-23      | CQQANSFPLTF      | IGKV1-12      |
| 282F4 | 4.7                      | PT28  | CARGRTYYYDSSGYPNWFDTW         | IGHV3-30      | CQHYNYPITF       | IGKV1-5       |
| 282A1 | 4.9                      | PT28  | CARDVDIVATIRYNYYGMDVW         | IGHV3-11      | CQQYDDSPPGTF     | IGKV3-20      |
| 28G5  | 5.4                      | PT28  | CAAPSCRGVTCYDGFNIW            | IGHV1-58      | CQQYDNPWTF       | IGKV3-20      |
| 472D6 | 5.4                      | PT47  | CTRFQRHCSSTSCGYMDVW           | IGHV3-49      | CQQYDNLWTF       | IGKV3-15      |
| 282A2 | 5.4                      | PT28  | CARGESWYKTSWFDPW              | IGHV4-59      | CTGWDDSLSGVVF    | IGLV1-47      |
| 47F1  | 5.8                      | PT47  | CAKRGGYCSATCFTRFYLDVW         | IGHV3-23      | CQQANSFPLTF      | IGKV1-12      |
| 47D1  | 6.0                      | PT47  | CARERRYGSWYISTGYFDYW          | IGHV1-69      | CSSYTNSSVVF      | IGLV2-14      |
| 28F1  | 8.0                      | PT28  | CAAPYCSGTCYDAFDIW             | IGHV1-58      | CQQFGTSPWTF      | IGKV3-20      |
| 47A4  | 8.4                      | PT47  | CAKRGGYCTDTICYTRYYYMDVW       | IGHV3-23      | CQQANSFPLTF      | IGKV1-12      |
| 47B2  | 9.1                      | PT47  | CARREGTGWFGYGMVDW             | IGHV1-69      | CSSYASSSLEVF     | IGLV2-14      |
| 28C5  | 9.1                      | PT28  | CARARGGTSWDFDYW               | IGHV6-1       | CQQYGSSYTF       | IGKV3-20      |
| 47B6  | 9.7                      | PT47  | CARNLGDDAFDIW                 | IGHV3-66      | CQQLNSYPPGTF     | IGKV1-9       |
| 282C3 | 10.0                     | PT28  | CARGRWEIDAFDIW                | IGHV3-53      | CQLLDSNPPGTF     | IGKV1-9       |
| 282D1 | 10.7                     | PT28  | CARELIRLGLVGDPAFYDLYSYHYGMDVW | IGHV3-21      | CCSYAGSSVVF      | IGLV2-23      |
| 47F4  | 10.9                     | PT47  | CAKRGGYCTDTICYTRYYYMDVW       | IGHV4-59      | CQSYDSSNPVVF     | IGLV6-57      |
| 28H5  | 11.1                     | PT28  | CATRPYYYGSGSYW                | IGHV3-11      | CSSYAGNNNFELF    | IGLV2-8       |
| 282B2 | 11.2                     | PT28  | CARVRRPNEDALAW                | IGHV1-69      | CQQYHSYSPITF     | IGKV1-5       |
| 472G6 | 12.3                     | PT47  | CATRVMRGVMGFDPW               | IGHV3-30      | CQQSYSTPITF      | IGKV1-39      |
| 28E1  | 12.6                     | PT28  | CARGGDILANQDAFDW              | IGHV1-69      | CQQYHSYSPLTF     | IGKV1-5       |
| 282B3 | 12.7                     | PT28  | CARDVPRAAGTLW                 | IGHV3-53      | CQQYDNLPTF       | IGKV1-33      |
| 28B5  | 13.1                     | PT28  | CATVDAGVIKDYFWGSYRQGYFDYW     | IGHV1-24      | CQQRSNWPWTF      | IGKV3-11      |
| 28A5  | 14.3                     | PT28  | CAREGYYYDSGGLVLSDYW           | IGHV7-4-1     | CQQYDNFRSF       | IGKV1-33      |
| 282H4 | 15.5                     | PT28  | CARGGQQLVDYFEKW               | IGHV1-3       | CQQYHGPWTF       | IGKV1-5       |
| 28B32 | 16.8                     | PT28  | CATPGGILAGPAANKDAFDIW         | IGHV1-69      | CQQYNSYSPITF     | IGKV1-5       |
| 28F2  | 17.0                     | PT28  | CAGLTAAAEPSFDYW               | IGHV1-46      | CQQSYSTPPTF      | IGKV1-39      |
| 34H5  | 17.0                     | PT34  | CARDNADPNRSYYYYYYGVVDW        | IGHV4-39      | CSSYSSSYVVF      | IGLV2-14      |
| 282E1 | 22.2                     | PT28  | CARAVGRVAGEF                  | IGHV4-38-2    | CQQRSNWPITF      | IGKV3-11      |
| 282H2 | 23.2                     | PT28  | CAGARGVVAGYSLSYW              | IGHV3-11      | CQQYDNPSTF       | IGKV1-33      |
| 282E3 | 23.3                     | PT28  | CARDGLLTMVRGIMGPAYDYW         | IGHV3-30-3    | CQQYDNLPTF       | IGKV1-33      |
| 47G5  | 24.0                     | PT47  | CATIFSGSSYELDHW               | IGHV1-18      | CGTWSSSLVVMF     | IGLV1-51      |
| 282F3 | 24.7                     | PT28  | CATPGDVTANKDAFDVW             | IGHV1-69      | CQQYHSYSPITF     | IGKV1-5       |
| 28B4  | 25.2                     | PT28  | CARGRPRSGLYW                  | IGHV3-30-3    | CQQYDEPTLTF      | IGKV1-33      |
| 282G1 | 25.5                     | PT28  | CARGDLTASGSGSDGMDVW           | IGHV1-69      | CQQYHSYSPITF     | IGKV1-5       |
| 282C4 | 25.6                     | PT28  | CARSAYYSDSSGYHFDYW            | IGHV1-69      | CQQYHSSPRTF      | IGKV3-20      |
| 282A3 | 26.3                     | PT28  | CATPGSIVGMSTTNKDAFDIW         | IGHV1-69      | CQQYHSYSPITF     | IGKV1-5       |
| 282E2 | 26.8                     | PT28  | CARDGESITMVRGLMSPAFDYW        | IGHV3-30-3    | CQQRYNWPRTF      | IGKV3-11      |
| 282A5 | 28.3                     | PT28  | CASPPGYTNSWYQFFQRW            | IGHV1-69      | CQQYNSYSYTF      | IGKV1-5       |
| 47A5  | 31.0                     | PT47  | CAASVRITDFWDFEDGFDIW          | IGHV1-58      | CQQFGSSPYTF      | IGKV3-20      |
| 282D4 | 31.1                     | PT28  | CARVSNGGNDYW                  | IGHV1-69      | CQAWDSSTALYVF    | IGLV3-1       |
| 28C6  | 32.2                     | PT28  | CATPADILAGSDAGPGKGTDTDFW      | IGHV1-69      | CQQYKSYSPLTF     | IGKV1-5       |
| 472F6 | 32.2                     | PT47  | CAKRGGYCTTICYTRYYYMDVW        | IGHV3-23      | CQQANSFPLTF      | IGKV1-12      |
| 28F3  | 33.1                     | PT28  | CARGRPRSGLYW                  | IGHV3-30-3    | CQQYDEPTLTF      | IGKV1-33      |
| 282C1 | 35.4                     | PT28  | CARFGYGTSTRYDYW               | IGHV3-66      | CQQYDNLVPTF      | IGKV1-33      |
| 34B6  | 38.0                     | PT34  | CASGSLAPNFFYYAMGVW            | IGHV1-46      | CSSWSSDNHPIF     | IGLV3-19      |
| 28E5  | 43.0                     | PT28  | CARDLRDWW                     | IGHV3-66      | CHQYDNLPRTF      | IGKV1-33      |
| 34F5  | 46.5                     | PT34  | CARDYYASGSYGWADSGW            | IGHV3-66      | CQQYITWPPMYTF    | IGKV3-15      |
| 282H1 | 49.6                     | PT28  | CARVARDLRVMYGDNLNYYYGMDVW     | IGHV3-53      | CQLTYTIPRF       | IGKV1-39      |
| 282H3 | 51.3                     | PT28  | CARATLGDCSGGPCGDAFDIW         | IGHV1-69      | CQQYHSYSPLTF     | IGKV1-5       |
| 34H6  | 52.6                     | PT34  | CARDLGPYGMVDW                 | IGHV3-53      | CQQLNSYPPYTF     | IGKV1-9       |
| 47D4  | 80.5                     | PT47  | CARDPYCRGGGCHIW               | IGHV3-53      | CQQYDNLPTF       | IGKV1-33      |

**Table S1. Activity, immunoglobulin gene usage, and CDR3 amino-acid sequences of neutralizing antibodies.** CDR3s with identical amino-acid sequences are highlighted in the same color. Related to Figure 2 and 3.



| Publications                                                    | Isolated neutralizing antibodies and their epitopes                                                                                                                                                                                        |
|-----------------------------------------------------------------|--------------------------------------------------------------------------------------------------------------------------------------------------------------------------------------------------------------------------------------------|
| Brouwer et al., Science, 2020                                   | 19 neutralizing antibodies (nAbs) isolated. 14 of them bind RBD. At least 5 RBD binding nAbs target ACE2 site.                                                                                                                             |
| Cao et al., Cell, 2020                                          | 14 nAbs isolated. The most potent one binds ACE2 site                                                                                                                                                                                      |
| Chi et al., Science, 2020                                       | 5 antibodies neutralize pseudotyped virus and 3 of them neutralize authentic virus. One of the five nAbs targets ACE2 site and another one (4A8) targets NTD.                                                                              |
| Hansen et al., Science, 2020                                    | Isolated over 200 antibodies with some degree of neutralizing activity. The most potent 9 nAbs all target ACE2 site.                                                                                                                       |
| Ju et al., Nature, 2020                                         | 16 nAbs isolated. 13 of them bind ACE2 site. The most potent antibodies (P2C-1F11, P2B-2F6, and P2C-1A3) bind ACE2 site.                                                                                                                   |
| Kreer et al., Cell, 2020                                        | 28 nAbs isolated. 27 of them bind RBD.                                                                                                                                                                                                     |
| Liu et al., Nature, 2020                                        | 19 potent nAbs isolated. nAbs directed against the top of RBD compete strongly with ACE2 binding and potently neutralize the virus. Those directed against the side surfaces of RBD do not compete with ACE2 and neutralize less potently. |
| Pinto et al., Nature, 2020                                      | Isolated S309 from SARS patient, targeting non-ACE2 site                                                                                                                                                                                   |
| Robbiani et al., Nature, 2020                                   | 52 isolated nAbs bind RBD at three epitopes (not further characterized).                                                                                                                                                                   |
| Rogers et al., Science, 2020                                    | 25 nAbs isolated. 24 of them bind two epitopes on RBD: RBD-A, RBD-B. Most potent nAbs target RBD-A (ACE2 site).                                                                                                                            |
| Seydoux et al., Immunity, 2020                                  | 2 nAbs isolated. The most potent one targets the ACE2 site.                                                                                                                                                                                |
| Shi et al., Nature, 2020                                        | 2 nAbs isolated. CB6 binds ACE2 site.                                                                                                                                                                                                      |
| Wan et al., Cell Reports, 2020                                  | 11 nAbs isolated. 6 of them target ACE2 site.                                                                                                                                                                                              |
| Wu et al., Science, 2020                                        | 4 nAbs isolated. 2 most potent ones target ACE2 site.                                                                                                                                                                                      |
| Zhou et al., 2020 (this study)                                  | Isolated 54 antibodies. 52 of them target ACE2 site.                                                                                                                                                                                       |
| Zost et al., Nature Medicine, 2020<br>Zost et al., Nature, 2020 | 70 nAbs isolated. 67 of them bind RBD. Among the 40 nAbs further characterized, 38 (including the most potent ones) target ACE2 site.                                                                                                      |

**Table S2. SARS-CoV-2 neutralizing antibodies and their epitopes.** Related to Figure 6.

| IGHV genes            | Baseline frequency (%)<br>Briney et al. | Brouwer et al. | Chi et al. | Ju et al. | Kreer et al. | Rogers et al. | Pinto et al. | Seydoux et al. | Shi et al. | Wu et al. | Yuan et al. | Zhou et al.<br>(this study) | Zost et al. | Subtotal |
|-----------------------|-----------------------------------------|----------------|------------|-----------|--------------|---------------|--------------|----------------|------------|-----------|-------------|-----------------------------|-------------|----------|
| IGHV1-2               | 5.13                                    | 5              |            | 1         | 2            | 9             |              | 4              |            | 2         |             |                             | 2           | 25       |
| IGHV1-3               | 0.56                                    |                |            |           |              |               |              | 1              |            |           |             | 1                           |             | 2        |
| IGHV1-8               | 2.34                                    | 1              |            |           | 1            |               |              |                |            |           |             |                             | 9           | 11       |
| IGHV1-18              | 4.54                                    | 3              |            |           | 1            |               | 1            | 7              | 1          |           |             | 1                           |             | 14       |
| IGHV1-24              | 1.07                                    | 4              | 1          |           |              |               |              | 4              |            |           |             | 1                           |             | 10       |
| IGHV1-45              | 0.01                                    |                |            |           |              |               |              |                |            |           |             |                             |             |          |
| IGHV1-46              | 2.01                                    | 1              |            | 1         |              | 3             |              | 2              |            |           |             | 2                           |             | 9        |
| IGHV1-58              | 0.20                                    |                |            |           | 3            |               |              |                |            |           |             | 5                           | 9           | 17       |
| IGHV1-69              | 4.12                                    | 10             |            | 2         | 2            | 2             |              | 1              |            |           |             | 13                          | 4           | 34       |
| IGHV1-69-2            | 0.07                                    |                |            |           |              |               |              |                |            |           |             |                             |             |          |
| IGHV2-5               | 0.46                                    |                |            |           |              |               |              |                |            |           |             |                             | 1           | 1        |
| IGHV2-26              | 0.01                                    |                |            |           |              |               |              |                |            |           |             |                             |             |          |
| IGHV2-70 or IGHV2-70D | 0.12                                    |                |            |           |              |               |              |                |            |           |             |                             | 4           | 4        |
| IGHV3-7               | 5.37                                    | 2              |            |           |              |               | 1            | 1              |            |           |             |                             | 2           | 6        |
| IGHV3-9               | 1.53                                    | 4              |            | 3         | 3            | 1             |              |                |            | 1         |             |                             | 6           | 18       |
| IGHV3-11              | 1.86                                    |                |            | 1         |              |               |              |                |            |           |             | 3                           | 1           | 5        |
| IGHV3-13              | 0.35                                    | 1              |            |           |              |               | 1            |                |            |           |             |                             |             | 2        |
| IGHV3-15              | 1.48                                    | 1              |            |           |              |               |              | 1              |            |           |             |                             | 1           | 3        |
| IGHV3-20              | 0.58                                    |                |            |           |              |               |              |                |            |           |             |                             | 3           | 3        |
| IGHV3-21              | 4.50                                    | 4              |            |           |              | 1             |              | 1              |            |           |             | 1                           | 1           | 8        |
| IGHV3-23              | 11.66                                   | 3              |            | 1         | 1            | 1             |              |                |            |           |             | 4                           | 2           | 12       |
| IGHV3-30              | 5.37                                    | 4              |            |           | 1            | 1             |              | 10             |            |           |             | 2                           | 2           | 20       |
| IGHV3-30-3            | 1.34                                    | 8              |            |           |              |               |              | 2              |            |           |             | 4                           |             | 14       |
| IGHV3-33              | 1.99                                    | 3              |            | 2         | 1            |               |              |                |            |           |             |                             |             | 6        |
| IGHV3-43 or IGHV3-43D | 0.45                                    |                |            |           |              |               |              |                |            |           |             |                             |             |          |
| IGHV3-48              | 3.81                                    | 1              |            | 1         | 1            | 1             |              |                |            |           |             |                             |             | 4        |
| IGHV3-49              | 0.56                                    |                |            |           | 2            |               |              |                |            |           |             | 1                           |             | 3        |
| IGHV3-53              | 1.77                                    | 5              |            | 1         |              | 4             |              | 1              |            | 1         |             | 5                           | 10          | 27       |
| IGHV3-64 or IGHV3-64D | 0.75                                    |                | 1          |           |              |               |              |                |            |           |             |                             |             | 1        |
| IGHV3-66              | 1.20                                    | 2              |            | 2         | 4            |               |              |                | 1          |           |             | 4                           | 4           | 17       |
| IGHV3-72              | 0.31                                    |                |            |           |              |               |              |                |            |           |             |                             |             |          |
| IGHV3-73              | 0.37                                    |                |            |           |              |               |              |                |            |           |             |                             |             |          |
| IGHV3-74              | 2.97                                    |                |            |           |              |               |              |                |            |           |             |                             |             |          |
| IGHV3-NL1             | 0.05                                    |                |            |           |              |               |              |                |            |           |             |                             |             |          |
| IGHV4-4               | 3.01                                    | 2              |            |           |              |               |              |                |            |           |             |                             |             | 2        |
| IGHV4-28              | 0.03                                    |                |            |           |              |               |              |                |            |           |             |                             |             |          |
| IGHV4-30-2            | 0.54                                    |                |            |           |              |               |              |                |            |           |             |                             |             |          |
| IGHV4-30-4            | 0.74                                    | 1              |            |           |              |               |              | 1              |            |           |             |                             |             | 2        |
| IGHV4-31              | 1.20                                    | 2              |            |           |              |               |              | 1              |            |           |             |                             | 1           | 4        |
| IGHV4-34              | 5.80                                    | 1              |            |           |              |               |              |                |            |           |             |                             | 1           | 2        |
| IGHV4-38-2            | 1.18                                    |                |            | 1         |              |               |              | 2              |            |           |             | 1                           |             | 4        |
| IGHV4-39              | 5.01                                    | 5              |            |           | 3            | 1             |              | 1              |            |           |             | 1                           | 3           | 14       |
| IGHV4-59              | 7.22                                    | 5              | 1          |           |              |               |              | 1              |            |           |             | 3                           | 2           | 12       |
| IGHV4-61              | 1.39                                    |                |            |           |              |               |              |                |            |           |             |                             | 1           | 1        |
| IGHV5-10-1            | 0.25                                    | 2              |            |           |              |               |              |                |            |           |             |                             |             | 2        |
| IGHV5-51              | 3.37                                    | 4              |            |           |              |               |              | 1              |            |           | 1           |                             | 1           | 7        |
| IGHV6-1               | 1.01                                    |                |            |           |              |               |              |                |            |           |             | 1                           |             | 1        |
| IGHV7-4-1             | 0.40                                    |                |            |           | 3            | 1             |              | 2              |            |           |             | 1                           |             | 7        |

Table S3. Numbers of neutralizing antibodies utilizing individual IGHV genes. Related to Figure 6.

|                                                |                       |
|------------------------------------------------|-----------------------|
| <b>Data collection</b>                         | 47D1 + SARS-CoV-2 RBD |
| Beamline                                       | NSLS-II 17-ID-2       |
| Wavelength (Å)                                 | 0.9793 Å              |
| Space group                                    | P 2 2 2               |
| Unit cell parameters                           |                       |
| a, b, c (Å)                                    | 75.7, 81.2, 112.5     |
| $\alpha$ , $\beta$ , $\gamma$ (°)              | 90, 90, 90            |
| Resolution (Å) <sup>a</sup>                    | 50.0-2.10 (2.14-2.10) |
| Unique reflections <sup>a</sup>                | 41,701                |
| Redundancy <sup>a</sup>                        | 5.8 (3.0)             |
| Completeness (%) <sup>a</sup>                  | 98.0 (85.4)           |
| $\langle I/\sigma_I \rangle$ <sup>a</sup>      | 38.0 (1.0)            |
| $R_{\text{sym}}^b$ (%) <sup>a</sup>            | 9.5 (90.7)            |
| $R_{\text{pim}}^b$ (%) <sup>a</sup>            | 2.8 (37.8)            |
| $CC_{1/2}^c$ (%) <sup>a</sup>                  | 99.5 (69.4)           |
| <b>Refinement statistics</b>                   |                       |
| Resolution (Å)                                 | 2.14-2.10             |
| Reflections (work)                             | 41,608                |
| Reflections (test)                             | 2,005                 |
| $R_{\text{cryst}}^d$ / $R_{\text{free}}^e$ (%) | 20.7/25.0             |
| No. of atoms                                   | 4,979                 |
| RBD                                            | 1,536                 |
| Fab                                            | 3,271                 |
| Glycan                                         | 52                    |
| Solvent                                        | 120                   |
| Average $B$ -values (Å <sup>2</sup> )          | 63                    |
| RBD                                            | 68                    |
| Fab                                            | 60                    |
| Glycan                                         | 94                    |
| Solvent                                        | 58                    |
| Wilson $B$ -value (Å <sup>2</sup> )            | 56                    |
| <b>RMSD from ideal geometry</b>                |                       |
| Bond length (Å)                                | 0.003                 |
| Bond angle (°)                                 | 0.61                  |
| <b>Ramachandran statistics (%)</b>             |                       |
| Favored                                        | 96.5                  |
| Outliers                                       | 0.0                   |
| <b>PDB code</b>                                | 7MF1                  |

<sup>a</sup> Numbers in parentheses refer to the highest resolution shell.

<sup>b</sup>  $R_{\text{sym}} = \sum_{hkl} \sum_i |I_{hkl,i} - \langle I_{hkl} \rangle| / \sum_{hkl} \sum_i I_{hkl,i}$  and  $R_{\text{pim}} = \sum_{hkl} (1/(n-1))^{1/2} \sum_i |I_{hkl,i} - \langle I_{hkl} \rangle| / \sum_{hkl} \sum_i I_{hkl,i}$ , where  $I_{hkl,i}$  is the scaled intensity of the  $i^{\text{th}}$  measurement of reflection  $h, k, l$ ,  $\langle I_{hkl} \rangle$  is the average intensity for that reflection, and  $n$  is the redundancy.

<sup>c</sup>  $CC_{1/2}$  = Pearson correlation coefficient between two random half datasets.

<sup>d</sup>  $R_{\text{cryst}} = \sum_{hkl} |F_o - F_c| / \sum_{hkl} |F_o| \times 100$ , where  $F_o$  and  $F_c$  are the observed and calculated structure factors, respectively.

<sup>e</sup>  $R_{\text{free}}$  was calculated as for  $R_{\text{cryst}}$ , but on a test set comprising 5% of the data excluded from refinement.

**Table S4. X-ray data collection and refinement statistics.** Related to Figure 7.

| 47D1                  | Distance [Å] | SARS-CoV-2 RBD |
|-----------------------|--------------|----------------|
| <b>Hydrogen bonds</b> |              |                |
| H:SER100A[OG]         | 3.7          | A:THR470[O]    |
| H:SER100A[N]          | 3.1          | A:THR470[O]    |
| H:GLY100[N]           | 3.0          | A:GLY482[O]    |
| H:ARG98[NH2]          | 3.3          | A:GLU484[OE1]  |
| H:ARG98[NE]           | 2.7          | A:GLU484[OE2]  |
| H:ARG98[N]            | 2.6          | A:GLU484[OE2]  |
| H:ARG98[NH1]          | 3.8          | A:LEU492[O]    |
| H:THR28[OG1]          | 2.6          | A:SER494[OG]   |
| H:PHE74[O]            | 3.8          | A:LYS444[NZ]   |
| H:ARG98[O]            | 3.1          | A:GLU484[N]    |
| <b>Salt bridges</b>   |              |                |
| H:ARG98[NE]           | 3.7          | A:GLU484[OE1]  |
| H:ARG98[NH2]          | 3.3          | A:GLU484[OE1]  |
| H:ARG98[NE]           | 2.7          | A:GLU484[OE2]  |
| H:ARG98[NH2]          | 3.7          | A:GLU484[OE2]  |

**Table S5. Hydrogen bonds and salt bridges identified at the 47D1-RBD interface using the PISA program. Related to Figure 7.**
